# Supplementary material for: Sensory Acceptance, Appetite Control and Gastrointestinal Tolerance of Yogurts Containing Coffee-Cascara Extract and Inulin
Source: PubMed Central journal article supplement (PMC7146162; doi:10.3390/nu12030627), 2020-02-27
Supplement: nutrients-12-00627-s001.pdf [file nutrients-12-00627-s001.pdf]

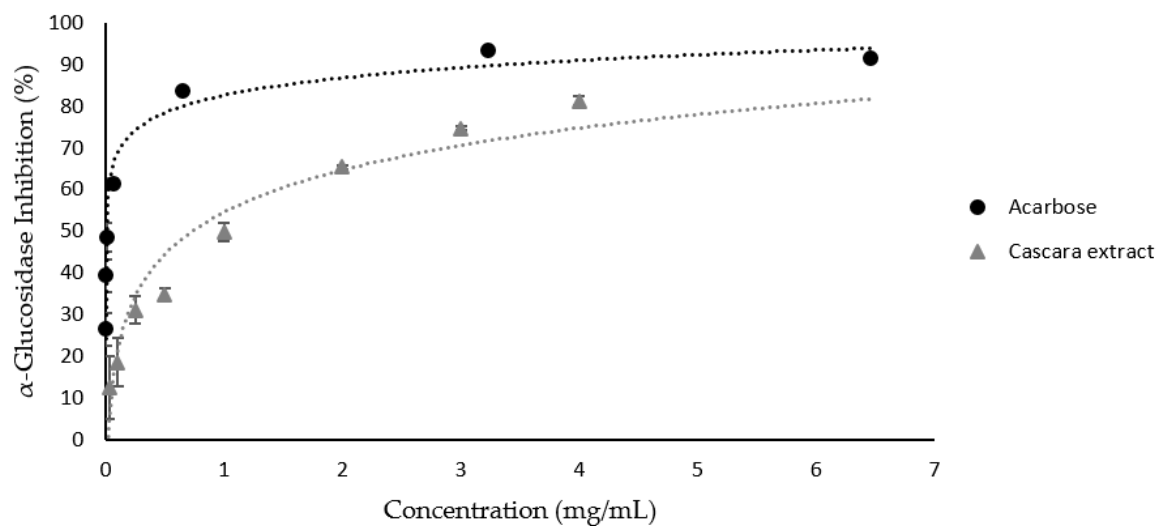

**Figure S1.** Effect on  $\alpha$ -glucosidase activity is represented by dose-response curves of the standard inhibitor acarbose (0.06  $\mu$ g/mL–6.5 mg/mL) and coffee-cascara byproduct (0.01–4 mg/mL). Values represent mean  $\pm$  standard deviation. This includes a duplicate of sample preparation and a triplicate of analysis.
